# Supplementary material for: Nonmechanistic forecasts of seasonal influenza with iterative one-week-ahead distributions
Source: PubMed Central journal article supplement (PMC6034894; doi:10.1371/journal.pcbi.1006134), 2018-06-15
Supplement: pcbi.1006134.s008.pdf [file pcbi.1006134.s008.pdf]

Absolute Error in wILI Estimates, by Location

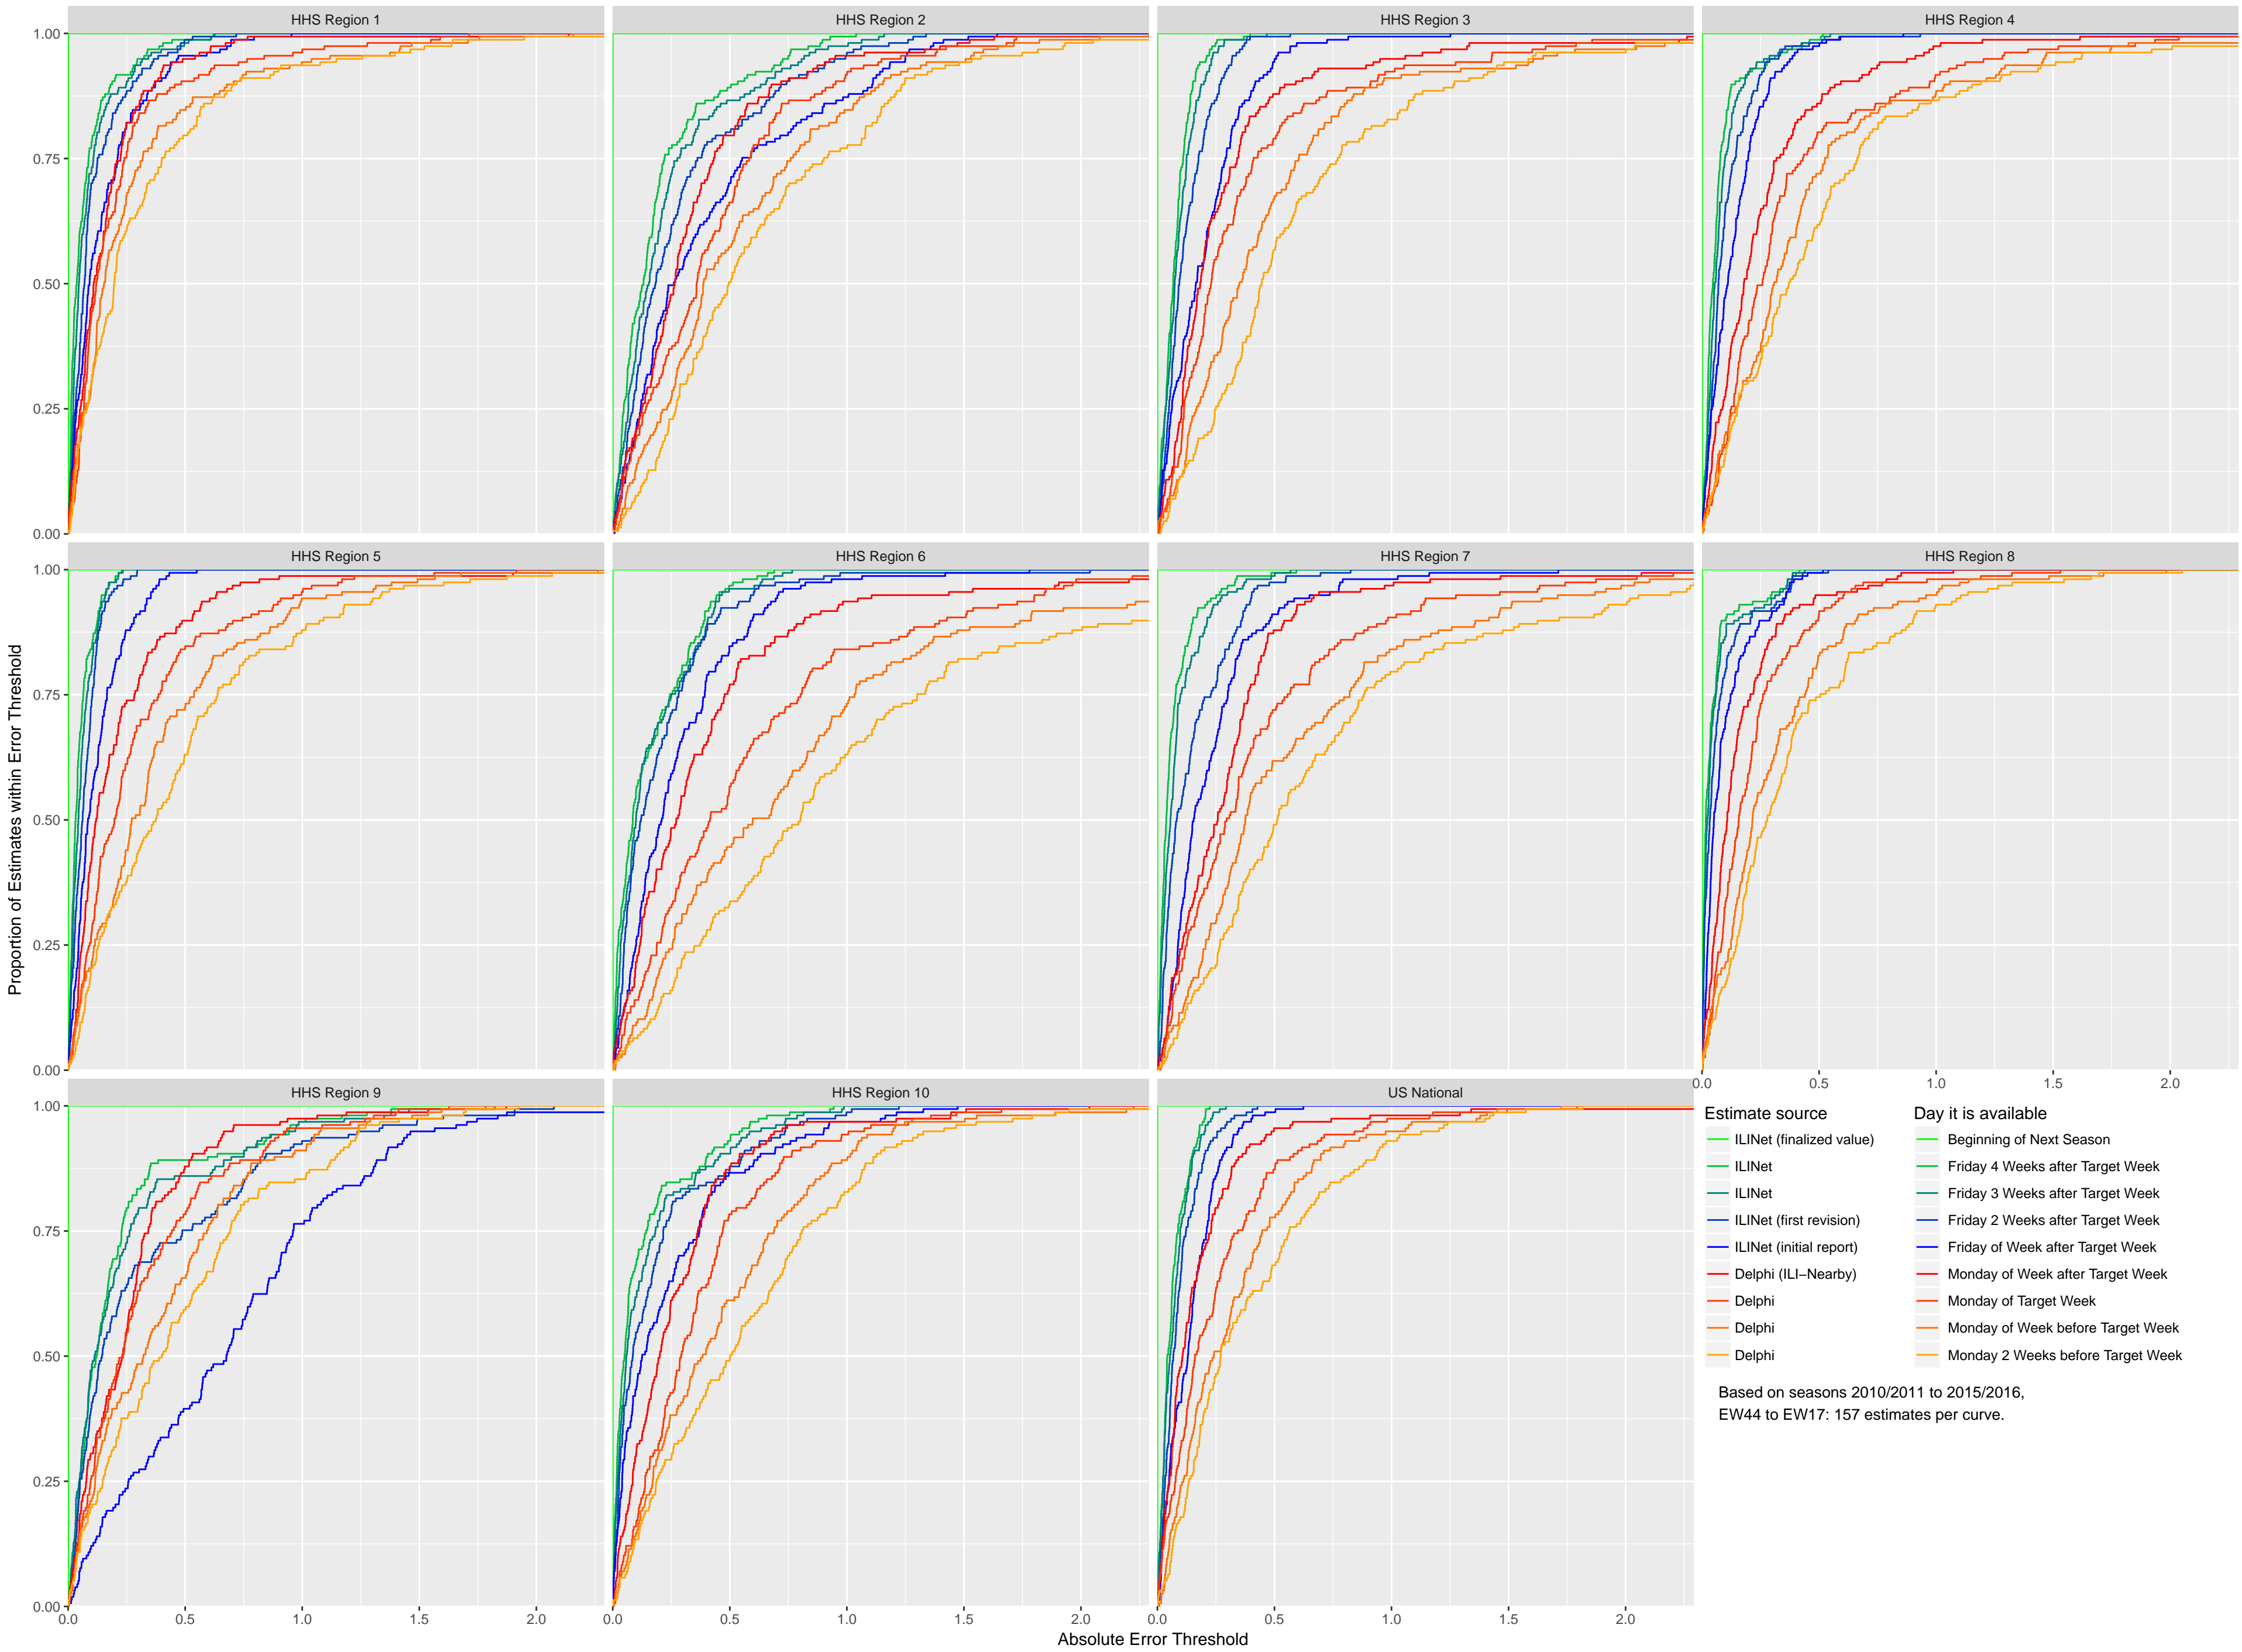

Estimate source

- ILINet (finalized value)
- ILINet
- ILINet
- ILINet (first revision)
- ILINet (initial report)
- Delphi (ILI-Nearby)
- Delphi
- Delphi
- Delphi

Day it is available

- Beginning of Next Season
- Friday 4 Weeks after Target Week
- Friday 3 Weeks after Target Week
- Friday 2 Weeks after Target Week
- Friday of Week after Target Week
- Monday of Week after Target Week
- Monday of Target Week
- Monday of Week before Target Week
- Monday 2 Weeks before Target Week

Based on seasons 2010/2011 to 2015/2016, EW44 to EW17: 157 estimates per curve.

| Estimate source          | Day it is available               | HHS Region 1 | HHS Region 2 | HHS Region 3 | HHS Region 4 | HHS Region 5 | HHS Region 6 | HHS Region 7 | HHS Region 8 | HHS Region 9 | HHS Region 10 | US National |
|--------------------------|-----------------------------------|--------------|--------------|--------------|--------------|--------------|--------------|--------------|--------------|--------------|---------------|-------------|
| ILINet (finalized value) | Beginning of Next Season          | 0.00         | 0.00         | 0.00         | 0.00         | 0.00         | 0.00         | 0.00         | 0.00         | 0.00         | 0.00          | 0.00        |
| ILINet                   | Friday 4 Weeks after Target Week  | 0.08         | 0.20         | 0.08         | 0.07         | 0.05         | 0.15         | 0.07         | 0.05         | 0.22         | 0.13          | 0.06        |
| ILINet                   | Friday 3 Weeks after Target Week  | 0.09         | 0.23         | 0.09         | 0.08         | 0.06         | 0.16         | 0.09         | 0.06         | 0.24         | 0.15          | 0.07        |
| ILINet (first revision)  | Friday 2 Weeks after Target Week  | 0.11         | 0.29         | 0.12         | 0.11         | 0.07         | 0.20         | 0.14         | 0.07         | 0.34         | 0.18          | 0.09        |
| ILINet (initial report)  | Friday of Week after Target Week  | 0.15         | 0.41         | 0.20         | 0.14         | 0.12         | 0.28         | 0.23         | 0.10         | 0.69         | 0.24          | 0.14        |
| Delphi (ILI-Nearby)      | Monday of Week after Target Week  | 0.17         | 0.35         | 0.29         | 0.27         | 0.22         | 0.42         | 0.31         | 0.16         | 0.27         | 0.27          | 0.18        |
| Delphi                   | Monday of Target Week             | 0.22         | 0.44         | 0.38         | 0.38         | 0.29         | 0.59         | 0.43         | 0.22         | 0.32         | 0.37          | 0.26        |
| Delphi                   | Monday of Week before Target Week | 0.28         | 0.54         | 0.51         | 0.46         | 0.39         | 0.79         | 0.57         | 0.32         | 0.40         | 0.48          | 0.34        |
| Delphi                   | Monday 2 Weeks before Target Week | 0.32         | 0.63         | 0.61         | 0.53         | 0.48         | 1.00         | 0.70         | 0.39         | 0.48         | 0.57          | 0.40        |
