# Supplementary material for: Nonmechanistic forecasts of seasonal influenza with iterative one-week-ahead distributions
Source: PubMed Central journal article supplement (PMC6034894; doi:10.1371/journal.pcbi.1006134), 2018-06-15
Supplement: pcbi.1006134.s010.pdf [file pcbi.1006134.s010.pdf]

Percent Error in wILI Estimates, Combined across 10 HHS Regions + National

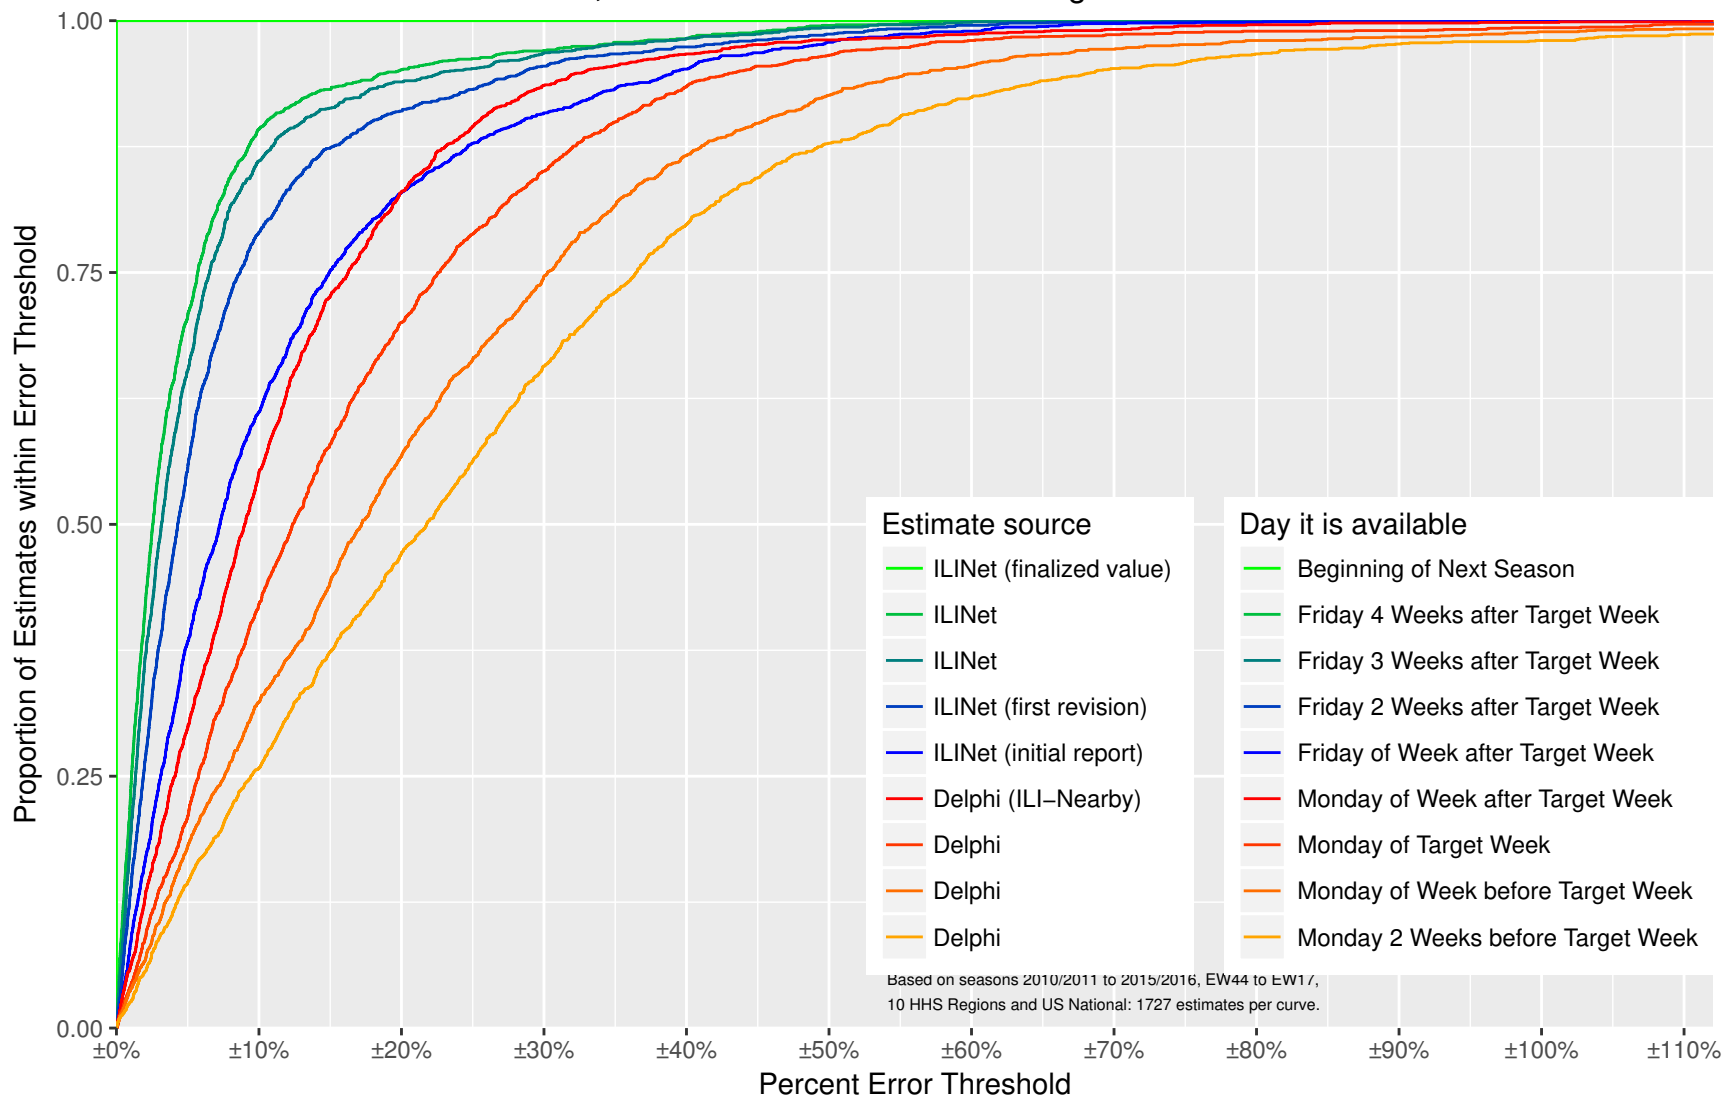

| Estimate source          | Day it is available               | Mean Percent Error |
|--------------------------|-----------------------------------|--------------------|
| ILINet (finalized value) | Beginning of Next Season          | ±0.0%              |
| ILINet                   | Friday 4 Weeks after Target Week  | ±5.1%              |
| ILINet                   | Friday 3 Weeks after Target Week  | ±5.9%              |
| ILINet (first revision)  | Friday 2 Weeks after Target Week  | ±7.7%              |
| ILINet (initial report)  | Friday of Week after Target Week  | ±11.6%             |
| Delphi (ILI-Nearby)      | Monday of Week after Target Week  | ±12.2%             |
| Delphi                   | Monday of Target Week             | ±16.6%             |
| Delphi                   | Monday of Week before Target Week | ±22.0%             |
| Delphi                   | Monday 2 Weeks before Target Week | ±26.8%             |
