# Supplementary material for: Nonmechanistic forecasts of seasonal influenza with iterative one-week-ahead distributions
Source: PubMed Central journal article supplement (PMC6034894; doi:10.1371/journal.pcbi.1006134), 2018-06-15

# Percent Error in wILI Estimates

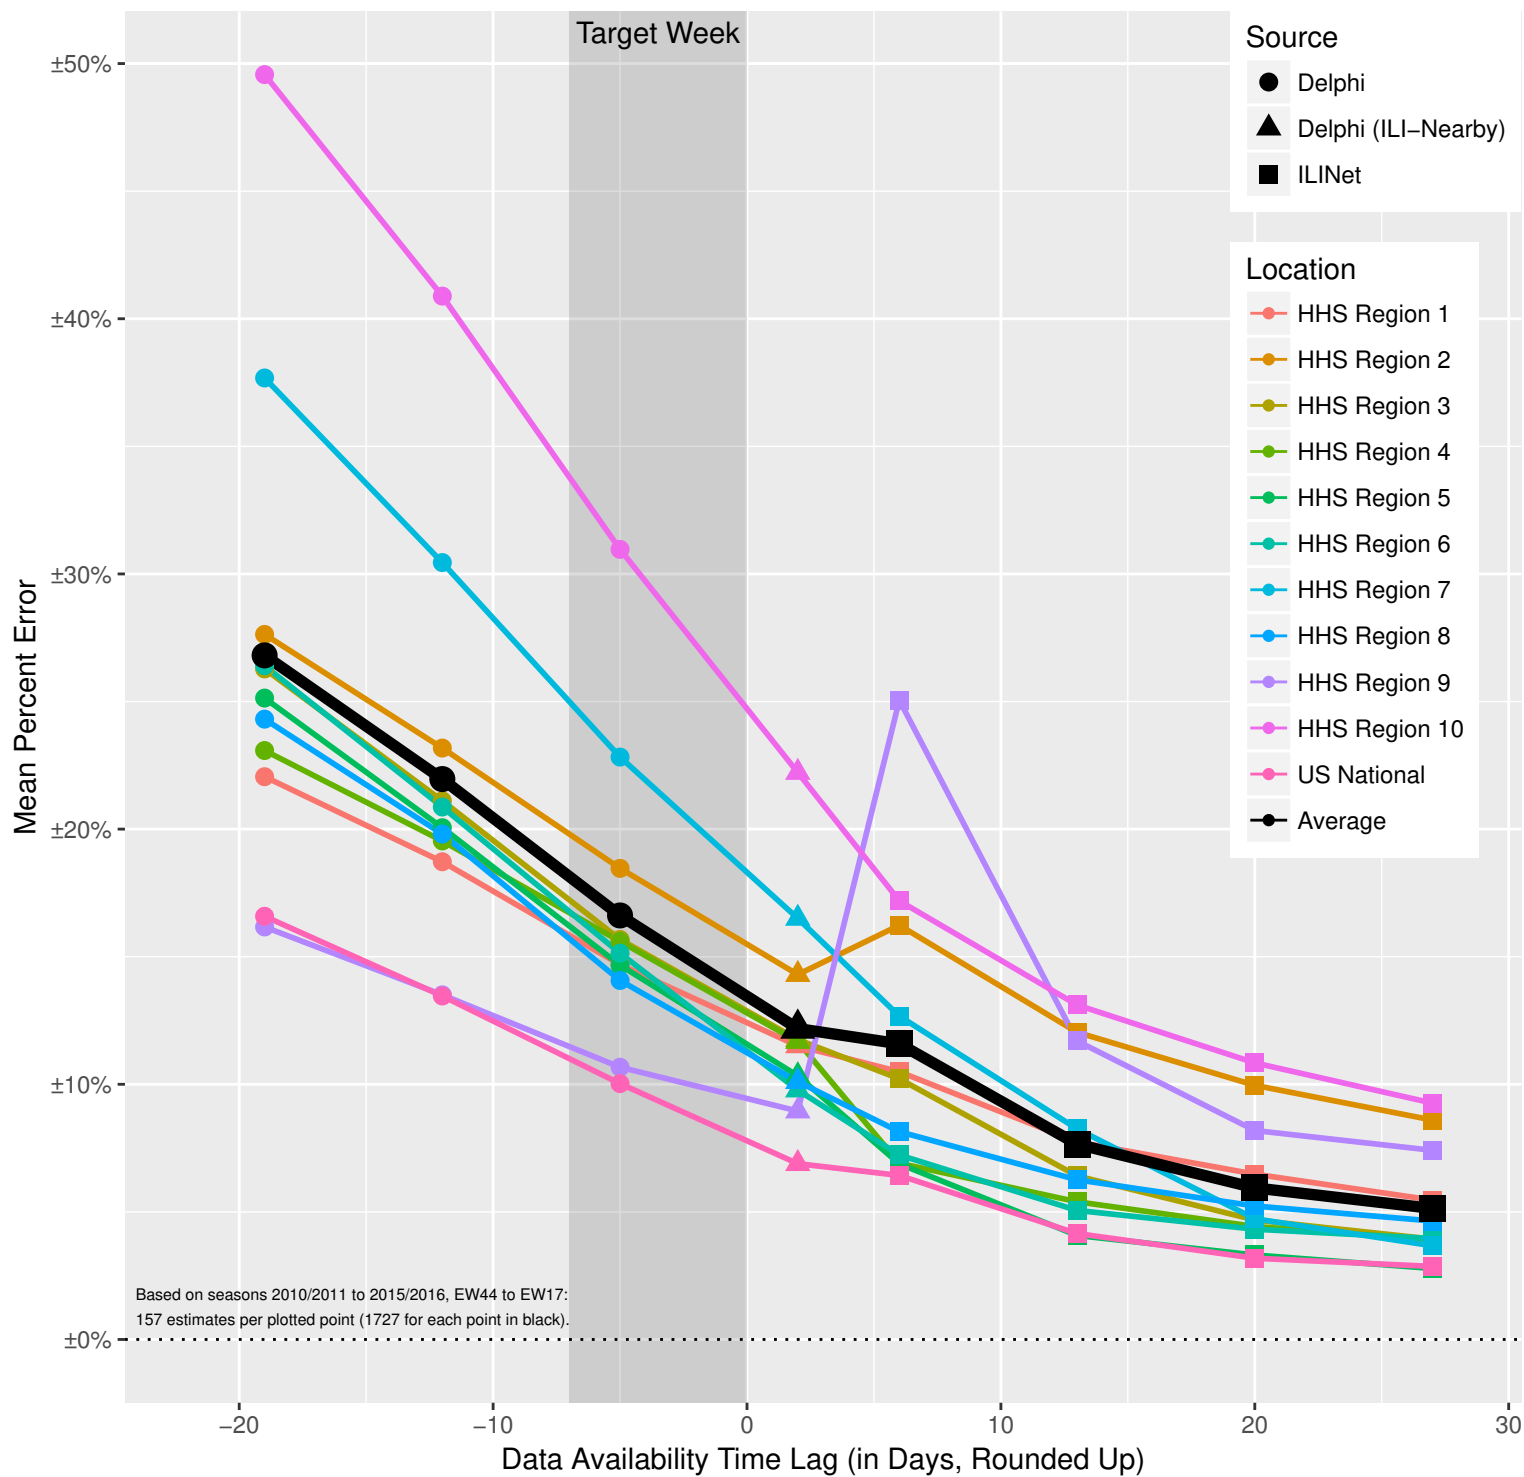

Supplement: pcbi.1006134.s011.pdf [file pcbi.1006134.s011.pdf]
