# Supplementary material for: Nonmechanistic forecasts of seasonal influenza with iterative one-week-ahead distributions
Source: PubMed Central journal article supplement (PMC6034894; doi:10.1371/journal.pcbi.1006134), 2018-06-15
Supplement: pcbi.1006134.s012.pdf [file pcbi.1006134.s012.pdf]

Percent Error in wILI Estimates, by Location

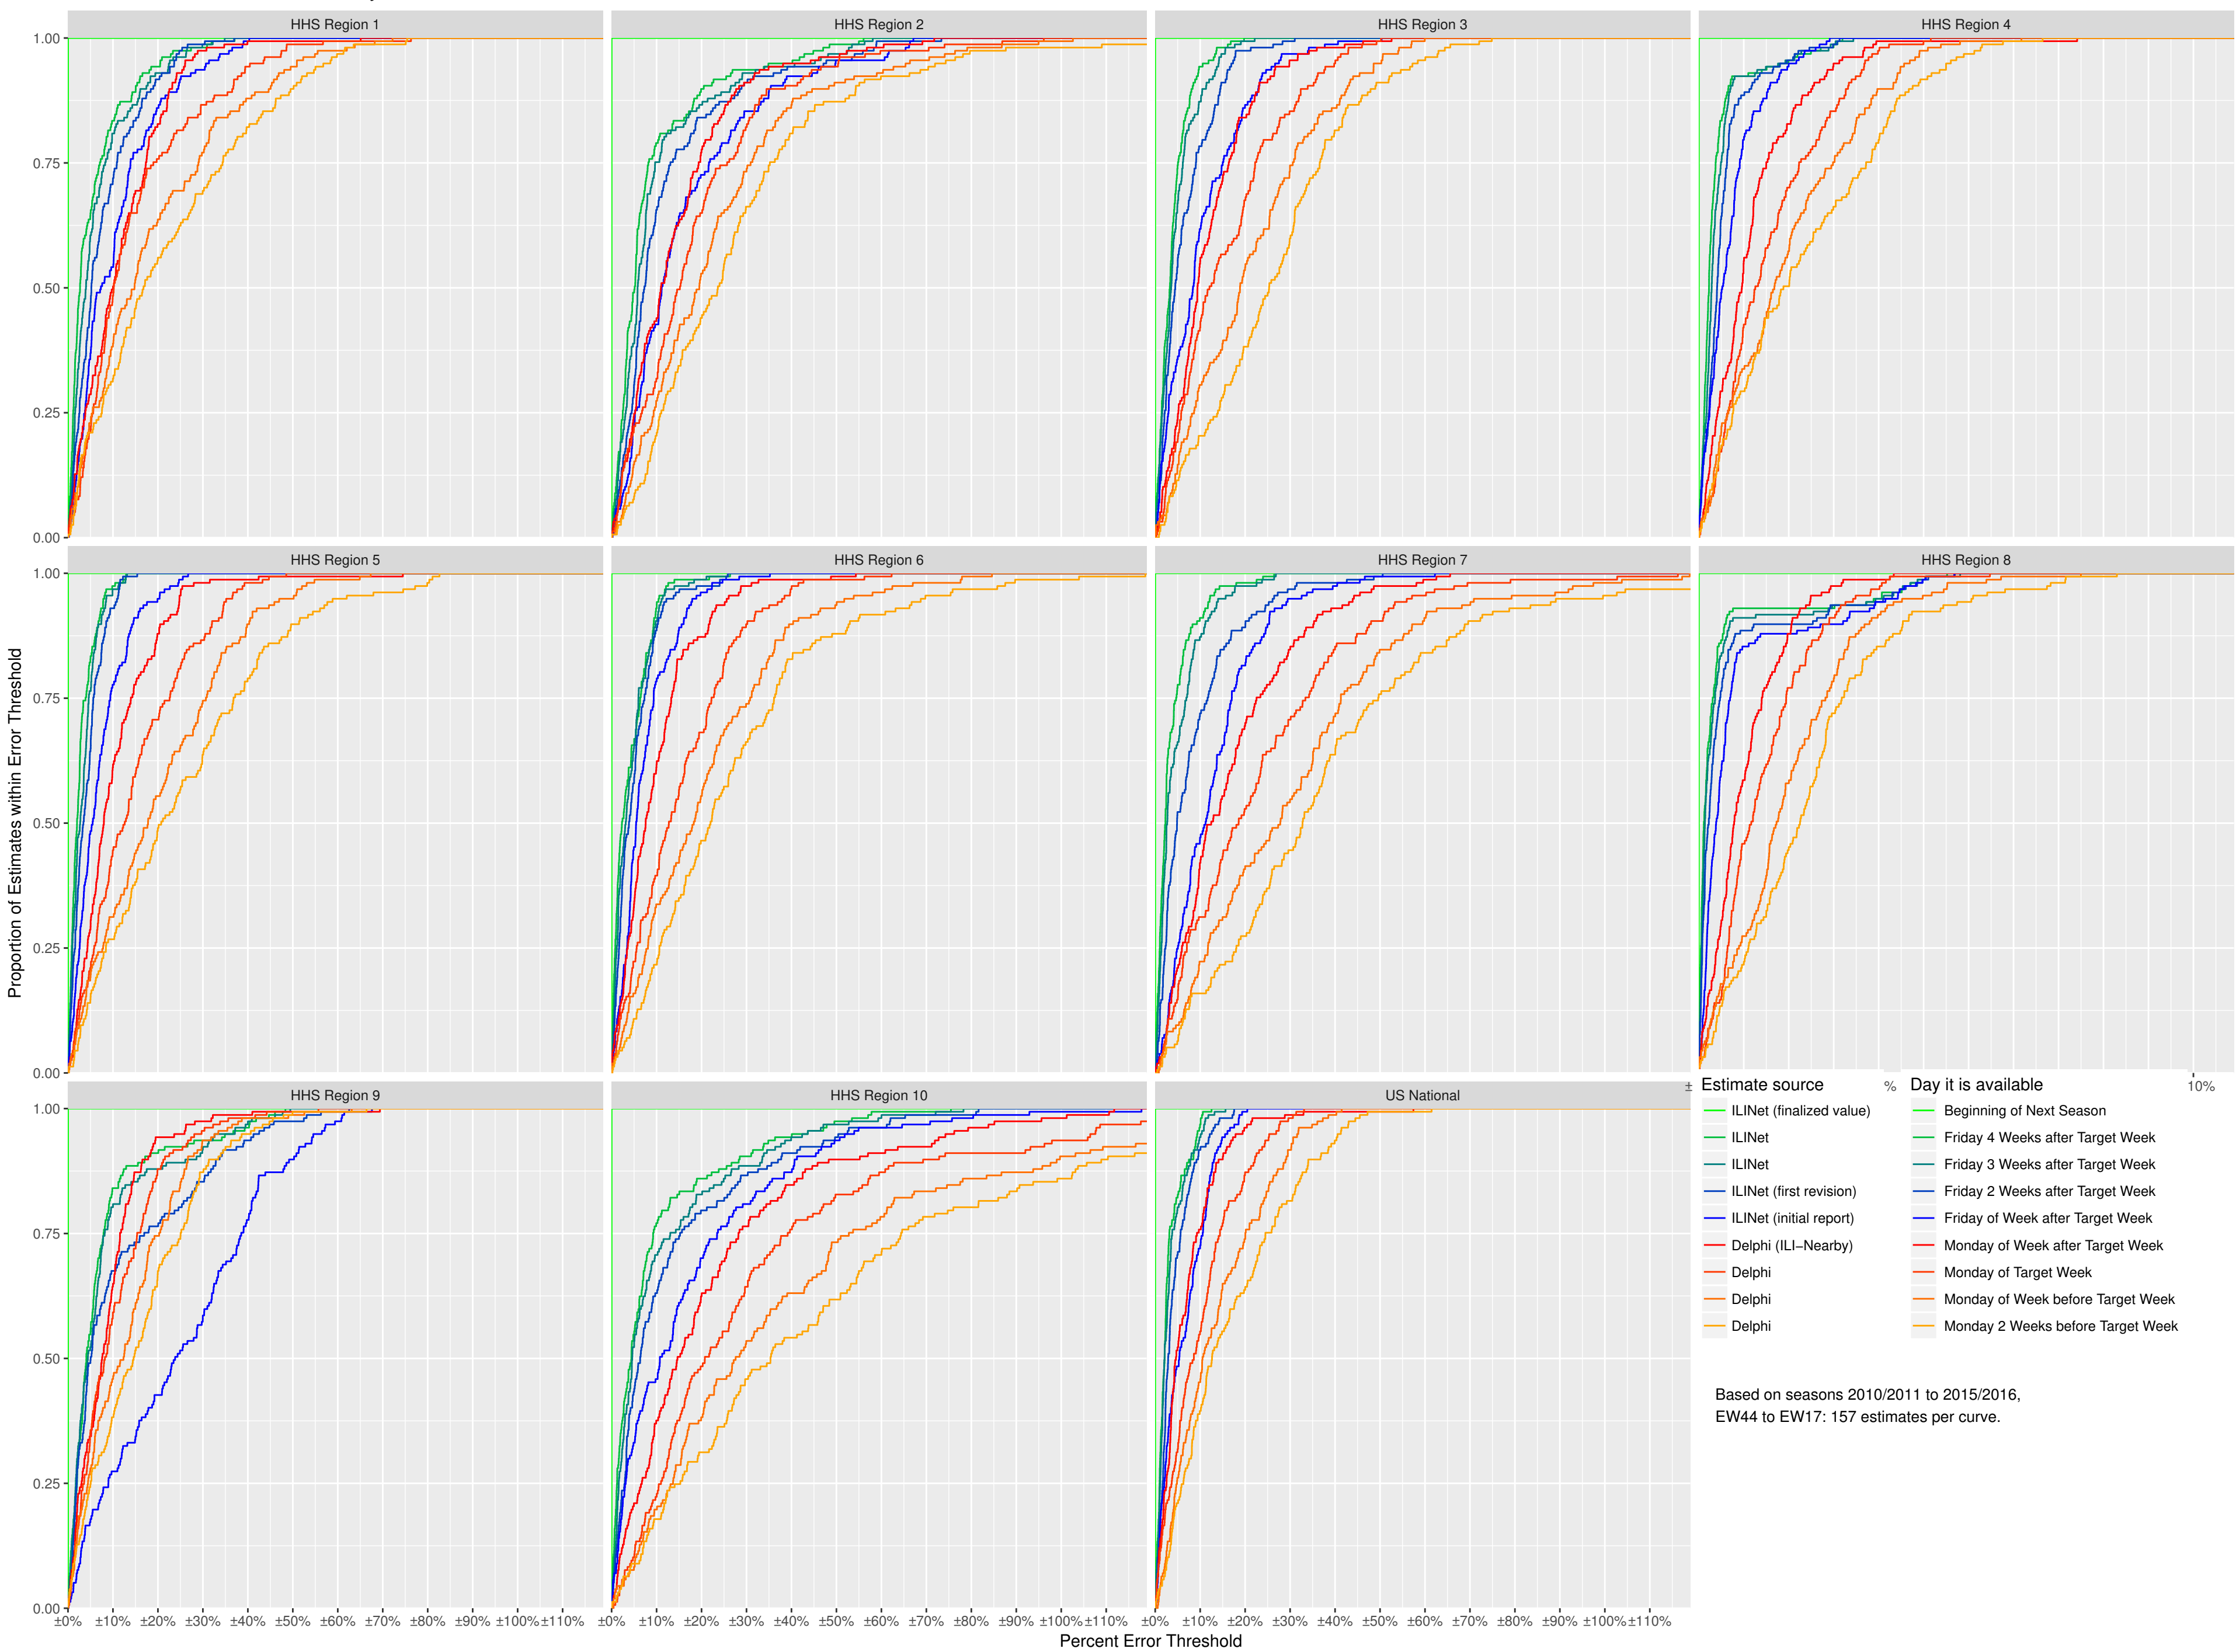

| Estimate source          | Day it is available               | HHS Region 1 | HHS Region 2 | HHS Region 3 | HHS Region 4 | HHS Region 5 | HHS Region 6 | HHS Region 7 | HHS Region 8 | HHS Region 9 | HHS Region 10 | US National |
|--------------------------|-----------------------------------|--------------|--------------|--------------|--------------|--------------|--------------|--------------|--------------|--------------|---------------|-------------|
| ILINet (finalized value) | Beginning of Next Season          | ±0.0%        | ±0.0%        | ±0.0%        | ±0.0%        | ±0.0%        | ±0.0%        | ±0.0%        | ±0.0%        | ±0.0%        | ±0.0%         | ±0.0%       |
| ILINet                   | Friday 4 Weeks after Target Week  | ±5.5%        | ±8.6%        | ±3.9%        | ±3.9%        | ±2.8%        | ±4.0%        | ±3.7%        | ±4.6%        | ±7.4%        | ±9.3%         | ±2.9%       |
| ILINet                   | Friday 3 Weeks after Target Week  | ±6.5%        | ±10.0%       | ±4.7%        | ±4.4%        | ±3.3%        | ±4.3%        | ±4.7%        | ±5.2%        | ±8.2%        | ±10.8%        | ±3.2%       |
| ILINet (first revision)  | Friday 2 Weeks after Target Week  | ±7.7%        | ±12.0%       | ±6.4%        | ±5.4%        | ±4.1%        | ±5.1%        | ±8.3%        | ±6.3%        | ±11.7%       | ±13.1%        | ±4.2%       |
| ILINet (initial report)  | Friday of Week after Target Week  | ±10.5%       | ±16.2%       | ±10.2%       | ±6.9%        | ±6.9%        | ±7.2%        | ±12.7%       | ±8.1%        | ±25.1%       | ±17.2%        | ±6.4%       |
| Delphi (ILI-Nearby)      | Monday of Week after Target Week  | ±11.5%       | ±14.3%       | ±11.8%       | ±11.7%       | ±10.3%       | ±9.8%        | ±16.5%       | ±10.1%       | ±9.0%        | ±22.2%        | ±6.9%       |
| Delphi                   | Monday of Target Week             | ±14.7%       | ±18.5%       | ±15.7%       | ±15.6%       | ±14.7%       | ±15.1%       | ±22.8%       | ±14.1%       | ±10.7%       | ±31.0%        | ±10.0%      |
| Delphi                   | Monday of Week before Target Week | ±18.7%       | ±23.2%       | ±21.1%       | ±19.5%       | ±20.1%       | ±20.9%       | ±30.4%       | ±19.8%       | ±13.5%       | ±40.9%        | ±13.5%      |
| Delphi                   | Monday 2 Weeks before Target Week | ±22.1%       | ±27.6%       | ±26.3%       | ±23.1%       | ±25.1%       | ±26.4%       | ±37.7%       | ±24.3%       | ±16.2%       | ±49.6%        | ±16.6%      |
