# Supplementary material for: Nonmechanistic forecasts of seasonal influenza with iterative one-week-ahead distributions
Source: PubMed Central journal article supplement (PMC6034894; doi:10.1371/journal.pcbi.1006134), 2018-06-15
Supplement: pcbi.1006134.s014.pdf [file pcbi.1006134.s014.pdf]

## Tabular evaluations of 2015/2016 forecasts

| Metric             | Target                 | #Obs. | Forecasting System   |                      |                      |
|--------------------|------------------------|-------|----------------------|----------------------|----------------------|
|                    |                        |       | Delphi-Archefilter   | Delphi-Epicast       | Delphi-Stat          |
| Multibin log score | Overall                | 2233  | -0.95 [0.390]        | -0.86 [0.420]        | <b>-0.81 [0.440]</b> |
|                    | Season onset           | 319   | <b>-1.69 [0.180]</b> | -1.98 [0.140]        | <b>-1.62 [0.200]</b> |
|                    | Season peak week       | 319   | <b>-1.45 [0.230]</b> | -1.51 [0.220]        | <b>-1.39 [0.250]</b> |
|                    | Season peak percentage | 319   | -0.73 [0.480]        | <b>-0.60 [0.550]</b> | -0.66 [0.520]        |
|                    | 1 wk ahead             | 319   | -0.53 [0.590]        | <b>-0.33 [0.720]</b> | <b>-0.33 [0.720]</b> |
|                    | 2 wk ahead             | 319   | -0.65 [0.520]        | <b>-0.42 [0.660]</b> | -0.47 [0.630]        |
|                    | 3 wk ahead             | 319   | -0.75 [0.470]        | <b>-0.52 [0.590]</b> | -0.57 [0.560]        |
|                    | 4 wk ahead             | 319   | -0.86 [0.420]        | <b>-0.64 [0.530]</b> | <b>-0.64 [0.530]</b> |
| Unibin log score   | Overall                | 2233  | -2.01 [0.130]        | -1.92 [0.150]        | <b>-1.74 [0.180]</b> |
|                    | Season onset           | 319   | -2.73 [0.070]        | -2.94 [0.050]        | <b>-2.42 [0.090]</b> |
|                    | Season peak week       | 319   | -2.57 [0.080]        | -2.45 [0.090]        | <b>-2.14 [0.120]</b> |
|                    | Season peak percentage | 319   | <b>-1.73 [0.180]</b> | <b>-1.74 [0.170]</b> | <b>-1.69 [0.180]</b> |
|                    | 1 wk ahead             | 319   | -1.55 [0.210]        | -1.30 [0.270]        | <b>-1.24 [0.290]</b> |
|                    | 2 wk ahead             | 319   | -1.70 [0.180]        | <b>-1.45 [0.230]</b> | <b>-1.42 [0.240]</b> |
|                    | 3 wk ahead             | 319   | -1.83 [0.160]        | -1.68 [0.190]        | <b>-1.56 [0.210]</b> |
|                    | 4 wk ahead             | 319   | -1.96 [0.140]        | -1.90 [0.150]        | <b>-1.68 [0.190]</b> |
| Absolute Error     | Overall                | 2233  | 1.10                 | <b>1.05</b>          | 1.11                 |
|                    | Season onset           | 319   | <b>2.59</b>          | <b>2.56</b>          | <b>2.64</b>          |
|                    | Season peak week       | 319   | <b>2.40</b>          | 2.57                 | 2.84                 |
|                    | Season peak percentage | 319   | 0.60                 | <b>0.49</b>          | 0.57                 |
|                    | 1 wk ahead             | 319   | 0.39                 | <b>0.31</b>          | 0.33                 |
|                    | 2 wk ahead             | 319   | 0.48                 | <b>0.38</b>          | 0.42                 |
|                    | 3 wk ahead             | 319   | 0.58                 | <b>0.46</b>          | <b>0.47</b>          |
|                    | 4 wk ahead             | 319   | 0.66                 | 0.55                 | <b>0.52</b>          |

Table A: **The three Delphi systems had similar overall scores; Delphi-Stat gave the best distributional forecasts overall, while Delphi-Epicast gave the best point predictions overall.** This table contains evaluations for the 2015/2016 season, averaged across locations and forecast weeks, for each target and a few evaluation metrics. Higher log scores and lower absolute error indicate better performance on distributional forecasts and point predictions, respectively. Values within 5% of the best value in each row are typeset in boldface. Numbers in brackets are the exponentiation of the corresponding log score. Each entry for a specific target is an average of 319 evaluations (from forecasts for 11 locations made over 29 weeks), giving a total of 2233 evaluations overall for each system.

| Grouping variable | Group value   | #Obs. | Forecasting System   |                      |                      |
|-------------------|---------------|-------|----------------------|----------------------|----------------------|
|                   |               |       | Delphi-Archefilter   | Delphi-Epicast       | Delphi-Stat          |
| Location          | HHS Region 1  | 203   | -0.76 [0.470]        | <b>-0.60 [0.550]</b> | <b>-0.59 [0.560]</b> |
|                   | HHS Region 2  | 203   | <b>-1.39 [0.250]</b> | -1.56 [0.210]        | <b>-1.42 [0.240]</b> |
|                   | HHS Region 3  | 203   | -0.70 [0.490]        | <b>-0.60 [0.550]</b> | -0.69 [0.500]        |
|                   | HHS Region 4  | 203   | -1.21 [0.300]        | -1.32 [0.270]        | <b>-1.04 [0.350]</b> |
|                   | HHS Region 5  | 203   | -0.86 [0.420]        | -0.80 [0.450]        | <b>-0.65 [0.520]</b> |
|                   | HHS Region 6  | 203   | -1.56 [0.210]        | <b>-0.77 [0.460]</b> | -0.85 [0.430]        |
|                   | HHS Region 7  | 203   | -1.03 [0.360]        | -1.00 [0.370]        | <b>-0.91 [0.400]</b> |
|                   | HHS Region 8  | 203   | -0.52 [0.600]        | -0.49 [0.620]        | <b>-0.41 [0.660]</b> |
|                   | HHS Region 9  | 203   | <b>-0.65 [0.520]</b> | -0.72 [0.490]        | -0.73 [0.480]        |
|                   | HHS Region 10 | 203   | -0.76 [0.470]        | <b>-0.56 [0.570]</b> | -0.74 [0.480]        |
|                   | US National   | 203   | -1.04 [0.350]        | -1.03 [0.360]        | <b>-0.90 [0.410]</b> |
| Forecast Week     | 1             | 77    | -1.07 [0.340]        | <b>-0.94 [0.390]</b> | -1.07 [0.340]        |
|                   | 2             | 77    | -0.99 [0.370]        | <b>-0.82 [0.440]</b> | -1.02 [0.360]        |
|                   | 3             | 77    | -0.99 [0.370]        | <b>-0.79 [0.460]</b> | -0.98 [0.380]        |
|                   | 4             | 77    | -0.92 [0.400]        | <b>-0.83 [0.440]</b> | -0.94 [0.390]        |
|                   | 5             | 77    | <b>-0.84 [0.430]</b> | -0.98 [0.380]        | -0.90 [0.410]        |
|                   | 6             | 77    | <b>-0.86 [0.420]</b> | -0.94 [0.390]        | <b>-0.82 [0.440]</b> |
|                   | 7             | 77    | -0.85 [0.430]        | -0.89 [0.410]        | <b>-0.74 [0.480]</b> |
|                   | 8             | 77    | -0.74 [0.480]        | -0.87 [0.420]        | <b>-0.64 [0.520]</b> |
|                   | 9             | 77    | -0.65 [0.520]        | -0.50 [0.610]        | <b>-0.47 [0.630]</b> |
|                   | 10            | 77    | -0.58 [0.560]        | <b>-0.33 [0.720]</b> | -0.38 [0.680]        |
|                   | 11            | 77    | -0.53 [0.590]        | <b>-0.32 [0.720]</b> | -0.39 [0.680]        |
|                   | 12            | 77    | -0.56 [0.570]        | -0.40 [0.670]        | <b>-0.37 [0.690]</b> |
|                   | 13            | 77    | -0.49 [0.610]        | -0.30 [0.740]        | <b>-0.28 [0.750]</b> |
|                   | 14            | 77    | -0.45 [0.640]        | -0.27 [0.760]        | <b>-0.26 [0.770]</b> |
|                   | 15            | 77    | -0.39 [0.670]        | <b>-0.22 [0.810]</b> | -0.24 [0.790]        |
|                   | 16            | 77    | -0.37 [0.690]        | <b>-0.19 [0.830]</b> | -0.21 [0.810]        |
|                   | 17            | 77    | -0.36 [0.700]        | <b>-0.19 [0.820]</b> | -0.23 [0.790]        |
|                   | 18            | 77    | -0.37 [0.690]        | <b>-0.21 [0.810]</b> | <b>-0.22 [0.810]</b> |
|                   | 42            | 77    | -1.38 [0.250]        | -1.31 [0.270]        | <b>-1.05 [0.350]</b> |
|                   | 43            | 77    | -1.19 [0.300]        | -1.17 [0.310]        | <b>-1.03 [0.360]</b> |
|                   | 44            | 77    | -1.15 [0.320]        | -1.18 [0.310]        | <b>-1.03 [0.360]</b> |
|                   | 45            | 77    | <b>-1.14 [0.320]</b> | -1.25 [0.290]        | <b>-1.13 [0.320]</b> |
|                   | 46            | 77    | -1.23 [0.290]        | -1.43 [0.240]        | <b>-1.15 [0.320]</b> |
|                   | 47            | 77    | -1.52 [0.220]        | -1.58 [0.210]        | <b>-1.29 [0.270]</b> |
|                   | 48            | 77    | -1.82 [0.160]        | -1.39 [0.250]        | <b>-1.31 [0.270]</b> |
|                   | 49            | 77    | -1.82 [0.160]        | -1.52 [0.220]        | <b>-1.44 [0.240]</b> |
|                   | 50            | 77    | -1.62 [0.200]        | <b>-1.20 [0.300]</b> | -1.37 [0.250]        |
|                   | 51            | 77    | <b>-1.42 [0.240]</b> | <b>-1.39 [0.250]</b> | <b>-1.37 [0.250]</b> |
|                   | 52            | 77    | -1.31 [0.270]        | -1.47 [0.230]        | <b>-1.21 [0.300]</b> |

Table B: **Delphi-Stat had consistently good aggregate multibin log score for different locations and weeks.** This table contains average multibin log scores for the 2015/2016 season, including all targets, broken down by location and forecast week. Each entry for a specific location is an average of 203 evaluations, and each entry for a specific forecast week is an average of 77 evaluations. Higher log scores indicate better performance of distributional forecasts. Values within 5% of the best log score in each row are typeset in boldface. Numbers in brackets are the exponentiation of the corresponding log score.
