# Supplementary material for: Nonmechanistic forecasts of seasonal influenza with iterative one-week-ahead distributions
Source: PubMed Central journal article supplement (PMC6034894; doi:10.1371/journal.pcbi.1006134), 2018-06-15
Supplement: pcbi.1006134.s016.pdf [file pcbi.1006134.s016.pdf]

# Tabular evaluations of CV forecasts

| Metric           | Target                 | Method                           | Mean  | Rough Standard Error Of Mean |
|------------------|------------------------|----------------------------------|-------|------------------------------|
| Unibin log score | Season onset           | Ensemble, adaptive weights (AWE) | -1.43 | 0.11                         |
| Unibin log score | Season onset           | Ensemble, fixed weights          | -1.45 | 0.11                         |
| Unibin log score | Season onset           | Ensemble, uniform weights        | -1.60 | 0.09                         |
| Unibin log score | Season onset           | Delta density, Markovian         | -1.54 | 0.17                         |
| Unibin log score | Season onset           | Delta density, extended (EDD)    | -1.62 | 0.18                         |
| Unibin log score | Season onset           | ILINet + empirical futures       | -2.51 | 0.25                         |
| Unibin log score | Season onset           | Empirical Bayes A (EBA)          | -2.18 | 0.20                         |
| Unibin log score | Season onset           | Empirical Bayes B                | -2.33 | 0.23                         |
| Unibin log score | Season onset           | Empirical Bayes C                | -2.37 | 0.25                         |
| Unibin log score | Season onset           | BR, degenerate                   | -3.74 | 0.28                         |
| Unibin log score | Season onset           | BR, residual density             | -2.32 | 0.20                         |
| Unibin log score | Season onset           | Targets, empirical               | -5.56 | 0.49                         |
| Unibin log score | Season onset           | Targets, conditional density     | -3.53 | 0.25                         |
| Unibin log score | Season onset           | Targets, uniform (UNIF)          | -3.53 | 0.00                         |
| Unibin log score | Season onset           | AWE improvement on EDD           | 0.18  | 0.08                         |
| Unibin log score | Season onset           | EDD improvement on EBA           | 0.57  | 0.12                         |
| Unibin log score | Season onset           | EBA improvement on UNIF          | 1.35  | 0.20                         |
| Unibin log score | Season peak week       | Ensemble, adaptive weights (AWE) | -1.67 | 0.11                         |
| Unibin log score | Season peak week       | Ensemble, fixed weights          | -1.66 | 0.11                         |
| Unibin log score | Season peak week       | Ensemble, uniform weights        | -1.81 | 0.09                         |
| Unibin log score | Season peak week       | Delta density, Markovian         | -1.84 | 0.17                         |
| Unibin log score | Season peak week       | Delta density, extended (EDD)    | -1.73 | 0.15                         |
| Unibin log score | Season peak week       | ILINet + empirical futures       | -2.99 | 0.31                         |
| Unibin log score | Season peak week       | Empirical Bayes A (EBA)          | -2.42 | 0.14                         |
| Unibin log score | Season peak week       | Empirical Bayes B                | -2.60 | 0.18                         |
| Unibin log score | Season peak week       | Empirical Bayes C                | -2.48 | 0.20                         |
| Unibin log score | Season peak week       | BR, degenerate                   | -5.07 | 0.21                         |
| Unibin log score | Season peak week       | BR, residual density             | -2.42 | 0.18                         |
| Unibin log score | Season peak week       | Targets, empirical               | -5.07 | 0.51                         |
| Unibin log score | Season peak week       | Targets, conditional density     | -3.31 | 0.19                         |
| Unibin log score | Season peak week       | Targets, uniform (UNIF)          | -3.50 | 0.00                         |
| Unibin log score | Season peak week       | AWE improvement on EDD           | 0.05  | 0.04                         |
| Unibin log score | Season peak week       | EDD improvement on EBA           | 0.69  | 0.14                         |
| Unibin log score | Season peak week       | EBA improvement on UNIF          | 1.08  | 0.14                         |
| Unibin log score | Season peak percentage | Ensemble, adaptive weights (AWE) | -3.04 | 0.09                         |
| Unibin log score | Season peak percentage | Ensemble, fixed weights          | -3.05 | 0.10                         |
| Unibin log score | Season peak percentage | Ensemble, uniform weights        | -3.16 | 0.08                         |
| Unibin log score | Season peak percentage | Delta density, Markovian         | -3.28 | 0.16                         |
| Unibin log score | Season peak percentage | Delta density, extended (EDD)    | -3.37 | 0.17                         |
| Unibin log score | Season peak percentage | ILINet + empirical futures       | -5.18 | 0.23                         |
| Unibin log score | Season peak percentage | Empirical Bayes A (EBA)          | -4.44 | 0.20                         |
| Unibin log score | Season peak percentage | Empirical Bayes B                | -4.79 | 0.22                         |
| Unibin log score | Season peak percentage | Empirical Bayes C                | -4.26 | 0.21                         |
| Unibin log score | Season peak percentage | BR, degenerate                   | -6.37 | 0.19                         |
| Unibin log score | Season peak percentage | BR, residual density             | -3.98 | 0.17                         |
| Unibin log score | Season peak percentage | Targets, empirical               | -8.12 | 0.41                         |
| Unibin log score | Season peak percentage | Targets, conditional density     | -4.49 | 0.13                         |
| Unibin log score | Season peak percentage | Targets, uniform (UNIF)          | -4.88 | 0.00                         |
| Unibin log score | Season peak percentage | AWE improvement on EDD           | 0.33  | 0.09                         |
| Unibin log score | Season peak percentage | EDD improvement on EBA           | 1.07  | 0.10                         |
| Unibin log score | Season peak percentage | EBA improvement on UNIF          | 0.44  | 0.20                         |
| Unibin log score | 1 wk ahead             | Ensemble, adaptive weights (AWE) | -2.65 | 0.05                         |
| Unibin log score | 1 wk ahead             | Ensemble, fixed weights          | -2.68 | 0.04                         |
| Unibin log score | 1 wk ahead             | Ensemble, uniform weights        | -2.91 | 0.04                         |
| Unibin log score | 1 wk ahead             | Delta density, Markovian         | -2.94 | 0.07                         |
| Unibin log score | 1 wk ahead             | Delta density, extended (EDD)    | -2.70 | 0.05                         |

|                  |            |                                  |       |      |
|------------------|------------|----------------------------------|-------|------|
| Unibin log score | 1 wk ahead | ILINet + empirical futures       | -6.48 | 0.11 |
| Unibin log score | 1 wk ahead | Empirical Bayes A (EBA)          | -3.00 | 0.07 |
| Unibin log score | 1 wk ahead | Empirical Bayes B                | -3.57 | 0.07 |
| Unibin log score | 1 wk ahead | Empirical Bayes C                | -3.37 | 0.08 |
| Unibin log score | 1 wk ahead | BR, degenerate                   | -7.88 | 0.12 |
| Unibin log score | 1 wk ahead | BR, residual density             | -3.09 | 0.06 |
| Unibin log score | 1 wk ahead | Targets, empirical               | -6.48 | 0.11 |
| Unibin log score | 1 wk ahead | Targets, conditional density     | -3.35 | 0.07 |
| Unibin log score | 1 wk ahead | Targets, uniform (UNIF)          | -4.88 | 0.00 |
| Unibin log score | 1 wk ahead | AWE improvement on EDD           | 0.05  | 0.02 |
| Unibin log score | 1 wk ahead | EDD improvement on EBA           | 0.30  | 0.04 |
| Unibin log score | 1 wk ahead | EBA improvement on UNIF          | 1.87  | 0.07 |
| Unibin log score | 2 wk ahead | Ensemble, adaptive weights (AWE) | -2.84 | 0.05 |
| Unibin log score | 2 wk ahead | Ensemble, fixed weights          | -2.88 | 0.04 |
| Unibin log score | 2 wk ahead | Ensemble, uniform weights        | -3.07 | 0.04 |
| Unibin log score | 2 wk ahead | Delta density, Markovian         | -3.09 | 0.06 |
| Unibin log score | 2 wk ahead | Delta density, extended (EDD)    | -2.89 | 0.05 |
| Unibin log score | 2 wk ahead | ILINet + empirical futures       | -6.51 | 0.11 |
| Unibin log score | 2 wk ahead | Empirical Bayes A (EBA)          | -3.31 | 0.07 |
| Unibin log score | 2 wk ahead | Empirical Bayes B                | -3.89 | 0.07 |
| Unibin log score | 2 wk ahead | Empirical Bayes C                | -3.71 | 0.08 |
| Unibin log score | 2 wk ahead | BR, degenerate                   | -8.29 | 0.12 |
| Unibin log score | 2 wk ahead | BR, residual density             | -3.24 | 0.06 |
| Unibin log score | 2 wk ahead | Targets, empirical               | -6.51 | 0.11 |
| Unibin log score | 2 wk ahead | Targets, conditional density     | -3.47 | 0.07 |
| Unibin log score | 2 wk ahead | Targets, uniform (UNIF)          | -4.88 | 0.00 |
| Unibin log score | 2 wk ahead | AWE improvement on EDD           | 0.05  | 0.01 |
| Unibin log score | 2 wk ahead | EDD improvement on EBA           | 0.42  | 0.05 |
| Unibin log score | 2 wk ahead | EBA improvement on UNIF          | 1.57  | 0.07 |
| Unibin log score | 3 wk ahead | Ensemble, adaptive weights (AWE) | -2.99 | 0.04 |
| Unibin log score | 3 wk ahead | Ensemble, fixed weights          | -3.01 | 0.04 |
| Unibin log score | 3 wk ahead | Ensemble, uniform weights        | -3.18 | 0.04 |
| Unibin log score | 3 wk ahead | Delta density, Markovian         | -3.19 | 0.06 |
| Unibin log score | 3 wk ahead | Delta density, extended (EDD)    | -3.05 | 0.04 |
| Unibin log score | 3 wk ahead | ILINet + empirical futures       | -6.54 | 0.11 |
| Unibin log score | 3 wk ahead | Empirical Bayes A (EBA)          | -3.56 | 0.08 |
| Unibin log score | 3 wk ahead | Empirical Bayes B                | -4.13 | 0.08 |
| Unibin log score | 3 wk ahead | Empirical Bayes C                | -3.91 | 0.09 |
| Unibin log score | 3 wk ahead | BR, degenerate                   | -8.50 | 0.12 |
| Unibin log score | 3 wk ahead | BR, residual density             | -3.35 | 0.05 |
| Unibin log score | 3 wk ahead | Targets, empirical               | -6.54 | 0.11 |
| Unibin log score | 3 wk ahead | Targets, conditional density     | -3.57 | 0.07 |
| Unibin log score | 3 wk ahead | Targets, uniform (UNIF)          | -4.88 | 0.00 |
| Unibin log score | 3 wk ahead | AWE improvement on EDD           | 0.06  | 0.02 |
| Unibin log score | 3 wk ahead | EDD improvement on EBA           | 0.51  | 0.06 |
| Unibin log score | 3 wk ahead | EBA improvement on UNIF          | 1.32  | 0.08 |
| Unibin log score | 4 wk ahead | Ensemble, adaptive weights (AWE) | -3.10 | 0.04 |
| Unibin log score | 4 wk ahead | Ensemble, fixed weights          | -3.12 | 0.04 |
| Unibin log score | 4 wk ahead | Ensemble, uniform weights        | -3.28 | 0.04 |
| Unibin log score | 4 wk ahead | Delta density, Markovian         | -3.29 | 0.05 |
| Unibin log score | 4 wk ahead | Delta density, extended (EDD)    | -3.16 | 0.04 |
| Unibin log score | 4 wk ahead | ILINet + empirical futures       | -6.57 | 0.11 |
| Unibin log score | 4 wk ahead | Empirical Bayes A (EBA)          | -3.76 | 0.08 |
| Unibin log score | 4 wk ahead | Empirical Bayes B                | -4.33 | 0.09 |
| Unibin log score | 4 wk ahead | Empirical Bayes C                | -4.10 | 0.10 |
| Unibin log score | 4 wk ahead | BR, degenerate                   | -8.69 | 0.10 |
| Unibin log score | 4 wk ahead | BR, residual density             | -3.41 | 0.05 |
| Unibin log score | 4 wk ahead | Targets, empirical               | -6.57 | 0.11 |
| Unibin log score | 4 wk ahead | Targets, conditional density     | -3.63 | 0.07 |
| Unibin log score | 4 wk ahead | Targets, uniform (UNIF)          | -4.88 | 0.00 |

|                  |            |                                  |       |      |
|------------------|------------|----------------------------------|-------|------|
| Unibin log score | 4 wk ahead | AWE improvement on EDD           | 0.06  | 0.02 |
| Unibin log score | 4 wk ahead | EDD improvement on EBA           | 0.60  | 0.07 |
| Unibin log score | 4 wk ahead | EBA improvement on UNIF          | 1.12  | 0.08 |
| Unibin log score | Overall    | Ensemble, adaptive weights (AWE) | -2.53 | 0.04 |
| Unibin log score | Overall    | Ensemble, fixed weights          | -2.55 | 0.04 |
| Unibin log score | Overall    | Ensemble, uniform weights        | -2.72 | 0.04 |
| Unibin log score | Overall    | Delta density, Markovian         | -2.74 | 0.06 |
| Unibin log score | Overall    | Delta density, extended (EDD)    | -2.65 | 0.06 |
| Unibin log score | Overall    | ILINet + empirical futures       | -5.25 | 0.11 |
| Unibin log score | Overall    | Empirical Bayes A (EBA)          | -3.24 | 0.08 |
| Unibin log score | Overall    | Empirical Bayes B                | -3.66 | 0.09 |
| Unibin log score | Overall    | Empirical Bayes C                | -3.46 | 0.11 |
| Unibin log score | Overall    | BR, degenerate                   | -6.93 | 0.11 |
| Unibin log score | Overall    | BR, residual density             | -3.11 | 0.06 |
| Unibin log score | Overall    | Targets, empirical               | -6.41 | 0.15 |
| Unibin log score | Overall    | Targets, conditional density     | -3.62 | 0.08 |
| Unibin log score | Overall    | Targets, uniform (UNIF)          | -4.49 | 0.00 |
| Unibin log score | Overall    | AWE improvement on EDD           | 0.11  | 0.02 |
| Unibin log score | Overall    | EDD improvement on EBA           | 0.59  | 0.06 |
| Unibin log score | Overall    | EBA improvement on UNIF          | 1.25  | 0.08 |

---
