# Supplementary material for: Nonmechanistic forecasts of seasonal influenza with iterative one-week-ahead distributions
Source: PLOS journal article supplement (doi:10.1371/journal.pcbi.1006134), 2018-06-15

# Absolute Error in wILI Estimates

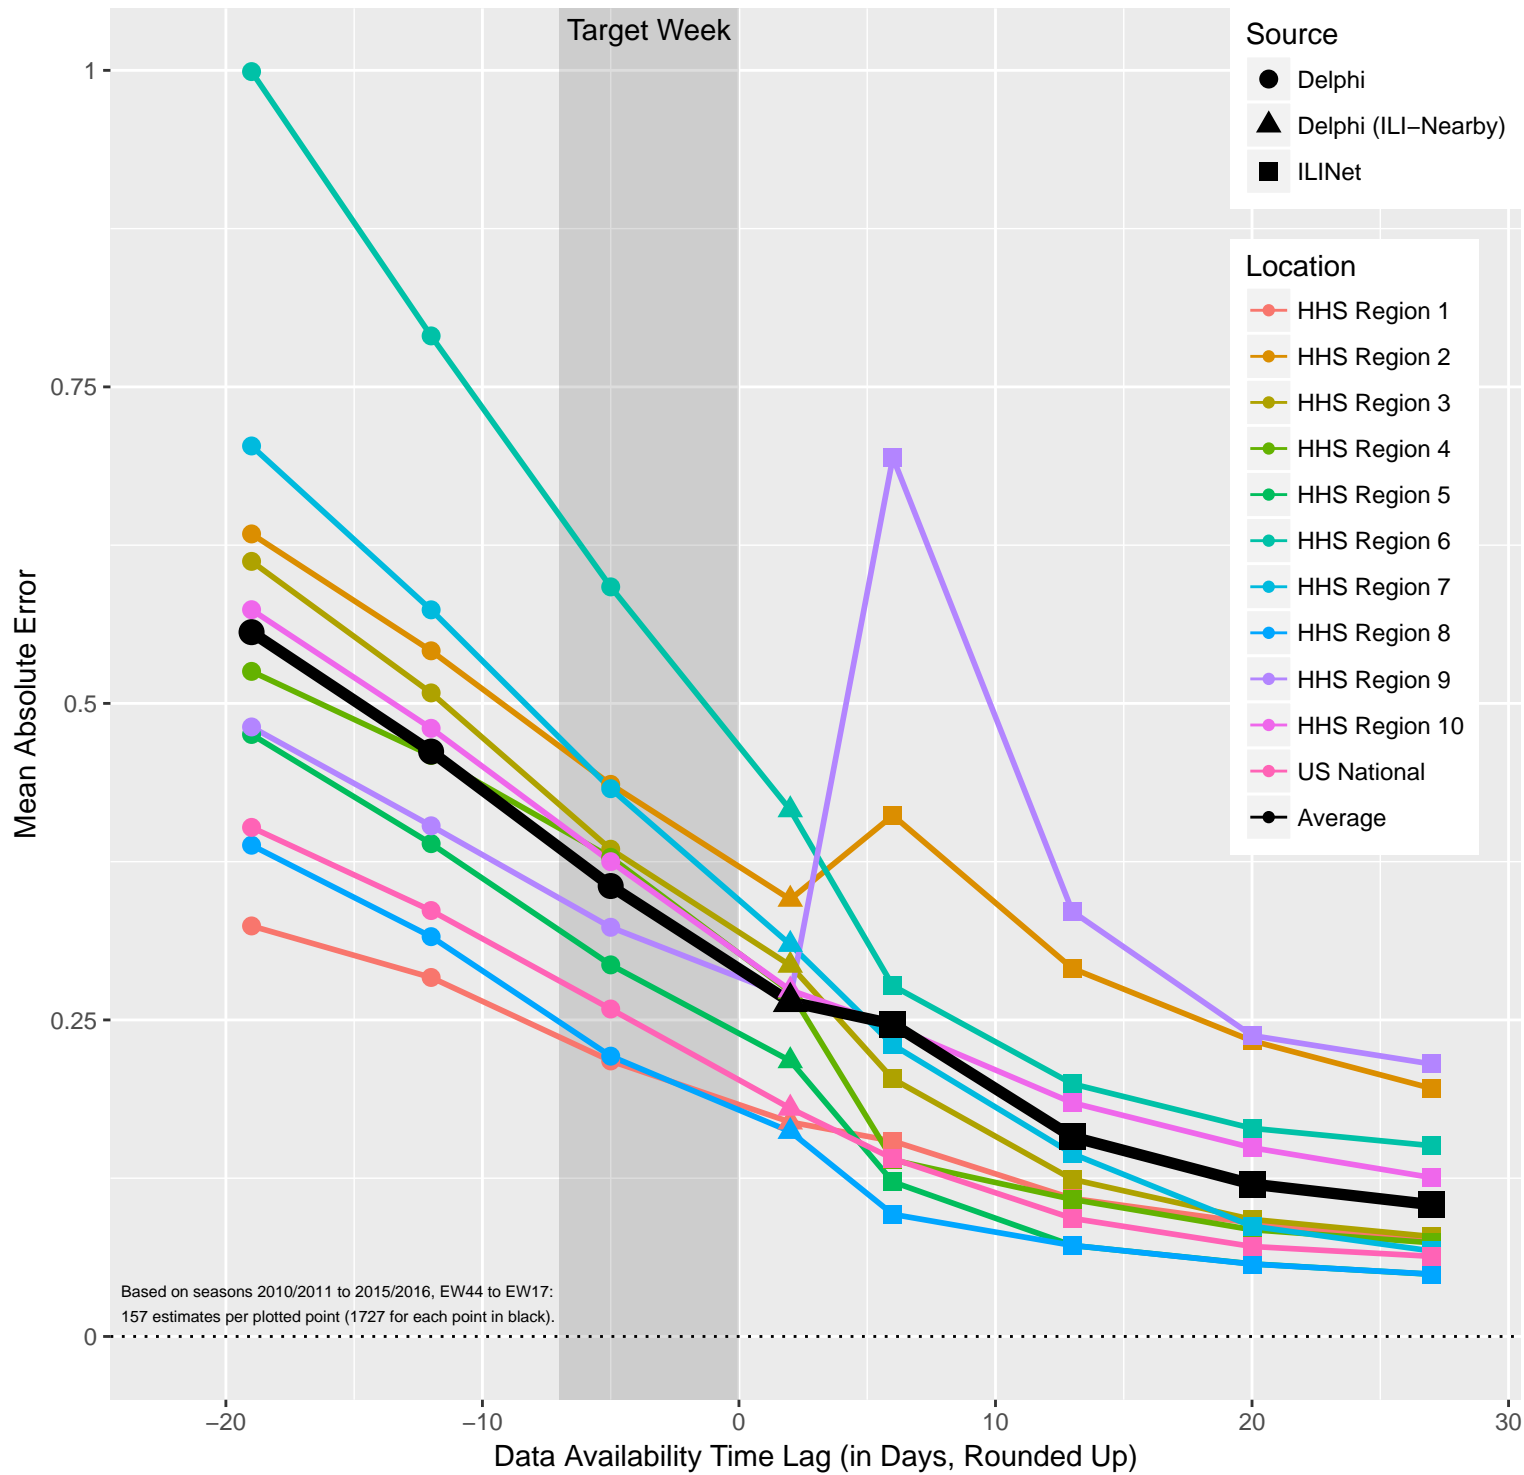

Supplement: S7 (10.1371/journal.pcbi.1006134.s007) [file journal.pcbi.1006134.s007]
